1 **Dying to make a care policy: Community perception of causes of deaths using standardized**  
2 **verbal autopsy method: Saudi type 2 diabetes mellitus register data**

3 Faleh Alyazidi <sup>1,2\*</sup> , Deler Shakely <sup>1</sup> , Max Petzold <sup>1</sup> , Fawaz Alyazidi <sup>3</sup> , Laith Hussain-Alkhateeb <sup>1</sup>

4 <sup>1</sup> School of Public Health and Community Medicine, Sahlgrenska Academy, University of Gothenburg,  
5 Gothenburg, Sweden

6 <sup>2</sup> Department of Public Health, College of Health Sciences at Al-Leith, Umm Al-Qura University, Al-Leith,  
7 Kingdom of Saudi Arabia

8 <sup>3</sup> Infectious Diseases Control Department, Executive Directorate of Preventive Medicine, Makkah  
9 Healthcare Cluster, Makkah, Kingdom of Saudi Arabia

10 \* Corresponding author

11 [Faleh.saud.alyazidi@gu.se](mailto:Faleh.saud.alyazidi@gu.se)

12

13

14

15

16

17

18

19

## 20 **Abstract:**

21 Diabetes mellitus (DM) is a serious global health issue which significantly impacts public health  
22 and socioeconomic development. Exploring how the community perceives the causes of deaths  
23 and their associated risk factors is crucial for public health. This study combines verbal autopsy  
24 (VA) with the Type 2 Diabetes Mellitus (T2DM) register to explore community perceptions of  
25 causes of death and associated influential factors in the western region of Saudi Arabia. 302 VA  
26 interviews were conducted with relatives or caregivers of deceased who died between 2017  
27 and 2021 based on T2DM medical register from Alnoor Specialist Hospital in Makkah city, Saudi  
28 Arabia. Cause-specific mortality fractions (CSMFs) obtained from the VA using the InterVA-5  
29 model were utilized to assess community perception. We used a multivariable logistic  
30 regression model to determine factors influencing community perceptions of causes of death.  
31 Lin's CCC with 95% CI was used to analyze the concordance for the CSMFs from verbal autopsy  
32 causes of death (VACoD) as a presumed reference standard and family-reported causes of  
33 death (FRCoD). The outcomes of this study demonstrate a generally broad spectrum of  
34 community perceived mortalities, with some critical misconceptions based on the type of death  
35 and the deceased's background and characteristics, with an overall CCC of 0.60 (95% CI: 0.20-  
36 1.00;  $p=003$ ). The study findings demonstrate that community perception is weak if the  
37 deceased was male compared to female (aOR: 0.52; 95% CI: 0.26 –1.03) and if the deceased  
38 was  $\geq 80$  years compared to 34–59 years (aOR: 0.48; 95% CI: 0.16-1.38), but it significantly  
39 improves among married compared to single (aOR: 2.13; 95% CI: 1.02 –4.42). The Saudi  
40 community perception of causes of death with reported type 2 diabetes was relatively plausible  
41 but varied substantially based on the type of death, sex, age  $\geq 80$  years, and other vital events

42 like marital status. Higher or lower community perception is attributed to how people may  
43 perceive risk factors associated with the causes of death, which can guide public health  
44 planning and interventional programs. The study findings further emphasize the need to  
45 employ robust and standardized VA methods within the routine medical services for a  
46 systemized assessment of families' reported causes of death.

47

48

49

50

51

52

53

54

55

56

57

58

59

60

61

## 62           **Introduction**

63    Diabetes mellitus (DM) remains a major global public health issue with a significant impact on  
64    public health and socio-economic development. Diabetes is one of the top ten causes of death  
65    worldwide. Together with cardiovascular diseases, respiratory diseases and cancer, these  
66    conditions account for over 80% of all premature non-communicable diseases (NCDs) deaths  
67    [1]. The International Diabetes Federation estimates that 536.6 million people were living with  
68    diabetes in 2021, and this number is projected to increase by 46%, reaching 783.2 million in  
69    2045 [2], with approximately 50% of all diabetic individuals are unaware of their conditions [3].  
70    Several reports have attributed the prevalence of DM in the Middle East and North Africa  
71    regions to the increased per capita income, urbanization, and pronounced lifestyle changes that  
72    enabled physical inactivity and increased the obesity rate.

73  
74    In the context of chronic illnesses and treatment management, community perception of health  
75    and illness – which is the ability to perceive the world through sensory organs [4] – is critical for  
76    public health administrative practices. A comprehensive and integrated approach to  
77    understanding how communities perceive health and disease is crucial for developing relevant  
78    and effective health intervention strategies and can empower individuals to seek and handle  
79    health knowledge properly [5-7]. Individuals are more likely to take action to prevent illnesses if  
80    they acknowledge their susceptibility to a particular form of illness or if they are likely to  
81    experience serious consequences [8]. Lay concepts of health and illness provide essential  
82    information to biomedical models [9, 10] and can significantly impact communities' health and  
83    illness behaviors, which requires systematic means of assessment at population level [6, 10].

84 Saudi Arabia is associated with this global epidemic of NCDs [11, 12]. According to the World  
85 Health Organization (WHO), Saudi Arabia has the second highest rate of diabetes in the Middle  
86 East (7<sup>th</sup> highest in the world), with an estimated population of 7 million diabetics and more  
87 than 3 million pre-diabetics [13], which is a serious public health issue. Previous Saudi reports  
88 have shown that the success of national response strategies is heavily dependent on the  
89 public's perceptions and attitudes toward the risk of an epidemic and the importance of  
90 preventive measures [14]. Addressing the health literacy problems among a culturally diverged  
91 Saudi population will be crucial by virtue of the undergoing health system re-engineering  
92 towards the Saudi 2030 Vision. The Vision 2030 Health Sector Transformation Program was  
93 initiated in 2021 with a five-year goal of reforming the health sector to become a  
94 comprehensive, effective, and integrated health system that prioritizes the health of individual  
95 and society, including citizens, residents, and visitors [15]. A growing body of evidence have  
96 additionally demonstrated that inadequate health literacy is significant among the Saudi  
97 population [16-18], whereby negative perceptions of diabetes risk factors can impede disease  
98 management and prevention. Patients with poor health literacy skills are prevalent among the  
99 Saudi population. A published cross-sectional survey conducted in Saudi Arabia to describe the  
100 distribution of low health literacy in the Saudi population found that 46% of respondents were  
101 classified as having low health literacy; this was associated with older age groups [17]. This  
102 group demands actively engaged healthcare professionals to effectively simplify the care  
103 management, which will only add more burden to the already overstretched health system  
104 caused by COVID-19 and other emerging diseases.

105

106 Global statistics show that about half of annual deaths pass without formal medical certification  
107 leaving crucial causes of death information outside any form of useful application for policy  
108 making and public health program monitoring [19-23]. While this issue is broadly associated  
109 with low- and middle-income countries (LMICs) due to insufficient investment in civil  
110 registration and vital statistics (CRVS) systems [23], higher income countries are also prone to  
111 misclassification of crucial international classification of disease (ICD) information [24]. Saudi  
112 Arabia is among countries facing demographic transition, which can influence the doctor-  
113 patient communications and hence the ultimate uptake of health information and their  
114 classifications.

115  
116 Verbal autopsy (VA) – standardized interviews conducted by trained fieldworkers or healthcare  
117 staff with final caregivers or close relatives of the deceased on the medical signs, symptoms,  
118 and circumstances surrounding deaths – has emerged in more recent time as a widely used  
119 method for determining causes of death in settings where adequate reporting and reliable  
120 classification of causes of death are distracted [25, 26]. While this set of VA information is  
121 classically processed by physicians to determine a likely medical cause of death, computerized  
122 tools such as *InterVA-5* have been validated in several settings, which demonstrate significant  
123 advantages over the VA physician review process, mainly being cheap and consistent over time  
124 and place [6, 27, 28]. VA is commonly conducted within registered and unregistered population  
125 and can consistently elicit information through structured and narrative sections using the  
126 standardized WHO VA questionnaires. At the end of the VA interview, the interviewer would  
127 typically finish off with asking respondents about their own interpretation of the causes of

128 death of their deceased, such information that can form the basis of understanding community  
129 perception of causes of death. Social autopsy (SA), a less structured method for investigating  
130 death, includes questions on changeable social, cultural, and healthcare system aspects, which  
131 shows great potential for routine public health applications [23, 29]. SA has often been used in  
132 connection with VA in registered populations. Nevertheless, it tends to be time and cost  
133 consuming if used as a sole tool, and unlike VA, it will not be amenable for large-scale  
134 applications or automated interpretations, which led to its innovation as VA-SA integrated  
135 process [29, 30].

136  
137 Within the Saudi research and health policy interests, where VA is rarely practiced, no studies  
138 have yet sought standardized tools such as the VA to explore the community perception of  
139 causes of death, which can have significant implications in guiding public health planning and  
140 novel interventional programs. This study will employ VA to explore the community perceptions  
141 of causes of death based on T2DM register in the Western region of Saudi Arabia. To success  
142 this study aim, VA causes of death (VACoD) as a presumed reference standard will be compared  
143 to the family-reported causes of death (FRCoD), and the determinants of the community  
144 perception will be further assessed across different causes of death groups and population  
145 backgrounds and characteristics.

146

## 147 **Methodology**

### 148 **Study population and context**

149 The study conducted 302 Verbal autopsy interviews with relatives or caregivers of the deceased  
150 who died between 2017 and 2021, according to T2DM medical register from the Alnoor  
151 Specialist Hospital – a public hospital in Makkah city, Saudi Arabia, which is among three other  
152 hospitals that constitute to major healthcare provider to a population size of 2.5 million. All  
153 patients included in this study fulfilled the study criteria; (1) death occurred between 2017 and  
154 2021 (small history interval to reduce recall bias during the VA process), (2) at least one clinical  
155 diagnosis (ICD) of T2DM, and (3) informed consent to perform the verbal autopsy interview  
156 given by the respondent.

157  
158 Makkah is a large province and of a relatively dynamic population compared to other Saudi  
159 provinces, mainly due to their close and constant interaction with people who come from all  
160 over the world to perform religion pilgrimage (Hajj and Umrah). This frequent (short and long-  
161 term) stay of a large population-scale creates a special demographic mix where migration of  
162 culture, economy, diseases, and demography is highly prevalent in this region. This diverged  
163 community has the potential to influence the community perceptions and beliefs about a  
164 certain phenomenon, such as how they perceive illness or causes of death.

### 165 **Verbal autopsy interpretation**

166 For VA interpretation, several software programs are used for automated interpretation such as  
167 '*Smart VA*', '*InSilicoVA*', and '*InterVA*' [31-33], with the *InterVA* being used more broadly [19,



168 33]. The 2016 WHO VA instrument has been updated to contain all the input variables needed  
169 by all three software, making their use more consistent and standardized. [28, 34, 35]. In recent  
170 years, a series of InterVA models have been created to interpret VA data using Bayesian  
171 probabilistic modeling [36].

172  
173 VA uses a Bayesian probability model to determine the most probable cause of death and their  
174 corresponding likelihoods for each VA case [5, 26, 37]. The Bayesian concept operation permits  
175 the combination of medical experts' views as prior and relevant available data, which can  
176 collectively augment the model outputs [6, 38]. This methodological process used in the  
177 InterVA model is explained in full elsewhere [36]. Using Bayes theorem, up to three probable  
178 causes of death (likelihood) are typically assigned for each cause by the automated InterVA  
179 tool, given the specific signs and symptoms reported [26, 33]. Each assigned cause has  
180 corresponding likelihoods, and the sum likelihoods of all assigned causes has a maximum value  
181 of 1.00 (or 100%). In cases where the likelihood proportions did not add up to 1.0 for a  
182 particular case, any remaining margin of likelihood not accounted for by the likelihood of the  
183 first, second, and third causes can therefore be included as a partial indeterminate component  
184 in analyzing overall cause of death and CSMFs patterns. It has been suggested that this is a  
185 more practical approach than aggregating the sum of small residual probabilities of unlikely  
186 causes, which might lead to misleading conclusion in a large number of cases [36]. The Cause-  
187 Specific Mortality Fraction (CSMF) is an output from the algorithm. CSMF corresponds to the  
188 proportion that each cause of death category contributed to the total number of deaths [5, 6,  
189 38].

## 190           **Data collection management**

191   Information on the deceased's background and characteristics were taken directly from the  
192   medical register at Alnoor Specialist hospital. Death records contained data for capturing vital  
193   events [deaths in and out-hospital, date of death, sex, age, ICD-10 code of causes of death, and  
194   contact details of the next of kin]. Considering the heterogeneous and dynamic population in  
195   this Province, other characteristics of the deceased such as nationality, marital status, and  
196   education, were also considered. A total of pre-estimated sample of 302 relatives or close  
197   caregivers of the deceased were randomly chosen from the medical register and consented to  
198   conduct the VA interview. In addition, interviews were administered by the first author  
199   together with a trained research assistant. The standard face-to-face VA interview process has  
200   been challenged by the COVID-19 pandemic, which coincided with the strict physical distancing  
201   preventive measures implemented in Saudi Arabia. Therefore, telephone interviews were  
202   sought as a substitute for the standard face-to-face method. The interviews were conducted in  
203   Arabic without audio-recording, but data were reviewed and safely stored at the university  
204   electronic databases after removing all personal identifiers, and all participants were  
205   anonymized. Closed-ended questions were collected using the Open Data Kit (ODK) on Android  
206   smartphones. VA data were reported into a Microsoft Access database, and the participants'  
207   study IDs were used to link the VA data with the background and characteristic information.

## 208           **Data management**

209   The deceased's age was categorized into four age groups (34-59, 60-69, 70-79, and  $\geq 80$  years  
210   old), and the levels of education were grouped as *illiterate, basic education including (primary,*

211 *secondary school, and high school), and advanced education including university level. The*  
212 *relationship between the VA informants and the deceased was classified into two groups (first-*  
213 *degree relative and second-degree relative), whereby the deceased marital status was*  
214 *dichotomized as single and married. The place of death was recorded and processed as binary*  
215 *information (home, hospital/health facility). The causes of death were further categorized into*  
216 *broader categories, described in S1 Table.*

## 217 **Data analysis**

218 Numerical and graphical descriptive statistics were generally sought for causes of death data in  
219 overall and per groups. Each individual VA was processed using InterVA-5 model, which assigns  
220 up to three likely causes of death per WHO VA cause categories [39], while FRCoDs were given  
221 as a single or two causes of death. Crude and adjusted logistic regression for the binomial  
222 agreement (agreement or not) between VACoD and FRCoD was analyzed against the  
223 informant's background, characteristics, and socioeconomic factors for each cause of death  
224 category. All potential confounders from the background and characteristic factors were  
225 assessed in a forward-wise likelihood ratio test. Statistical analyses were performed using  
226 STATA release 17.0 software using a significant level of 5% as a cut-off for the hypothesis test.

227  
228 Generated causes of death likelihoods were utilized to calculate population-level CSMFs for  
229 each cause of death group between VACoD and FRCoD, and their proportional absolute  
230 differences and 95% confidence intervals were calculated. A concordance correlation  
231 coefficient (CCC) for the CSMFs from VACoD and FRCoD was also calculated using Lin's CCC with  
232 95% CI [40]. Based on Pearson's correlation, the CCC compares the viewpoints between the two

233 measures – just like other correlation tests, CCC has a range of -1 to 1, with 1 representing  
234 perfect agreement [41]. The CCC combines precision and accuracy measures to determine how  
235 far the observed data vary from the perfect concordance line (that is, the line at 45 degrees on  
236 a square scatter plot). Lin's coefficient increases in value as a function of the data's reduced  
237 major axis's closeness to the perfect concordance line (data accuracy) and the data's tightness  
238 about its reduced major axis (the precision of the data) [40]. The CCC can essentially estimate  
239 the agreement between VACOD and FRCOD from a population causes of death level.

## 240 **Ethical approval**

241 This study received the ethical approval to perform the VA interviews from the Institutional  
242 Review Board (IRB) at Makkah Health Affairs, Saudi Arabia (IRB Number: H-02-K-076-0321-478).  
243 The study was aligned with the Declaration of Helsinki. Informed consent was fully respected at  
244 both individual and household levels, with the right to refuse or withdraw from interviews.  
245 Additionally, data was only accessed by the principal researcher for the purposes of the study  
246 to ensure the confidentiality and anonymity of the participants.

## 247 **Results**

248 A total of 302 deceased relatives or caregivers were contacted and consented to conduct the  
249 VA interview, with three out of the respondents being female. Of these interviews, which were  
250 completed successfully over 4 months, InterVA-5 assigned either single, two, or three likely  
251 causes of death; a single cause of death to 299 individuals (99%), two likely causes to 26  
252 individuals (8.60%), and three likely causes to 2 cases (0.66%). Three cases (0.99%) were

253 explicitly designated ‘indeterminate’ by InterVA-5, generally reflecting a lack of particular VA  
254 data or contradictory evidence.

255  
256 For the VA interviews where FRCoD was reported, 255 families (84.43%) gave a single cause of  
257 death, and 124 families (41.05%) reported two causes. There were 36 families (11.92%) where  
258 the given likely causes of death were considered ‘indeterminate’ since they did not match with  
259 the International Classification of Diseases (ICD-10) codes.

260  
261 The results from a multivariable logistic regression model for exploring factors of determining  
262 the community perception are presented in Table 1. Based on the study findings, the odds ratio  
263 of the agreement decreases if the deceased was male compared to female (aOR: 0.52; 95% CI:  
264 0.26 –1.03) and it significantly increases if married compared to single (aOR: 2.13; 95% CI: 1.02  
265 –4.42). Improved perception of causes of death was associated with deaths of people with  
266 advanced education compared to illiterate (aOR:1.21; 95% CI: 0.45 – 3.20), and the death  
267 occurring at hospital compared to deaths at home (aOR: 1.25; 95% CI: 0.56 – 2.80), despite  
268 being not statistically significant. In addition, the odds of agreement tend to decrease if the  
269 interview was conducted with a respondent of a second-degree relationship to the deceased  
270 compared to a first-degree relationship (aOR: 0.91; 95% CI: 0.37 –2.20). Our results found that  
271 the odd ratio of the agreement for age groups (60-69, 70–79, and >=80 years) increases if the  
272 deceased aged 60-69 and 70-79 years compared to deaths aged 34-59 years, and the likelihood  
273 tends to decrease if the deceased was >=80 years compared to the reference (aOR: 1.34; 95%  
274 CI: 0.60 – 2.98, aOR:1.04; 95% CI: 0.45 – 2.41 and, aOR:0.48; 95% CI: 0.16 – 1.38, respectively).

275 **Table 1. Background and characteristics of 302 deaths in Makkah region, Saudi Arabia, and**  
 276 **showing multivariable OR for agreement between FRCoD and VACoD.**

| Background characteristics | Number of deaths<br><i>n</i> (%) | Crude OR (95% CI)   | Adjusted OR (95% CI) |
|----------------------------|----------------------------------|---------------------|----------------------|
| <b>Age group</b>           |                                  |                     |                      |
| 34–59                      | 68 (22.52)                       | Ref                 | Ref. <sup>a</sup>    |
| 60-69                      | 88 (29.14)                       | 1.37 (0.61 - 3.04)  | 1.34 (0.60-2.98)     |
| 70–79                      | 84 (27.81)                       | 1.09 (0.48 – 2.51)  | 1.04 (0.45-2.41)     |
| >=80                       | 62 (20.53)                       | 0.50 (0.17 - 2.42)  | 0.48 (0.16-1.38)     |
| <b>Sex</b>                 |                                  |                     |                      |
| Female                     | 126 (41.72)                      | Ref                 | Ref. <sup>b</sup>    |
| Male                       | 176 (58.28)                      | 0.72 (0.40 - 1.31)  | 0.52 (0.26-1.03)     |
| <b>Respondent</b>          |                                  |                     |                      |
| First degree relationship  | 260 (86.09)                      | Ref                 | Ref. <sup>c</sup>    |
| Second degree relationship | 42 (13.91)                       | 0.90 (0.37 - 2.16)  | 0.91(0.37-2.20)      |
| <b>Education</b>           |                                  |                     |                      |
| Illiterate                 | 121 (40.07)                      | Ref                 | Ref. <sup>d</sup>    |
| Basic education            | 137 (45.36)                      | 1.09 (0. 51 - 2.32) | 1.09 (0.52- 2.30)    |
| Advance education          | 44 (14.57)                       | 1.24 (0. 46 - 3.32) | 1.21 (0.45- 3.20)    |
| <b>Year of death</b>       |                                  |                     |                      |
| 2018                       | 28 (9.27)                        | Ref                 | Ref. <sup>c</sup>    |
| 2019                       | 69 (22.85)                       | 0.48 (0.14 - 1.54)  | 0.49 (0.15-1.62)     |

|                       |             |                    |                   |
|-----------------------|-------------|--------------------|-------------------|
| 2020                  | 161 (53.31) | 0.90 (0.34 - 2.42) | 0.90 (0.33-2.47)  |
| 2021                  | 44 (14.57)  | 0.81 (0.24 – 2.66) | 0.89 (0.26-2.99)  |
| <b>Marital status</b> |             |                    |                   |
| Single                | 116 (38.41) | Ref                | Ref. <sup>c</sup> |
| Married               | 186 (61.59) | 1.78 (0.93 – 3.41) | 2.13 (1.02-4.42)* |
| <b>Place of death</b> |             |                    |                   |
| Home                  | 60 (19.87)  | Ref                | Ref. <sup>c</sup> |
| Hospital              | 242 (80.13) | 1.29 (0.59 - 2.82) | 1.25 (0.56-2.80)  |

277 **Abbreviation(s):** FRCoD: Family reported causes of death

278 VACoD: Verbal autopsy causes of death

279 a, adjusted for sex

280 b, adjusted for education, marital status and age groups

281 c, adjusted for age groups and sex

282 d, adjusted for age groups, sex and marital status

283

284 To evaluate the community perceptions of causes of death, CSMFs obtained from the VA using

285 the InterVA-5 model were utilized to assess FRCoD, along with the CSMF absolute differences

286 and their 95% confidence intervals. Table 2 shows that infectious diseases, stroke, and

287 circulatory-related deaths were found to be underestimated as probable causes of death

288 reported by families in relation to the VA reference standard. In contrast, CSMF of

289 indeterminate and renal-related deaths groups, were overestimated as probable causes of

290 death. In addition, accidental, NCD and diabetes related deaths groups were slightly

291 overestimated with a minimal absolute CSMF difference. Despite no ICD codes being assigned

292 by InterVA-5 for covid-19 (had no defined ICD code at the time) and mental illness-related

293 deaths categories, the CSMF attributed to covid-19 by families was as high as 13.18% of all  
294 deaths.

295 **Table 2. Cause specific mortality fractions per disease categories derived from VACoD and**  
296 **FRCoD for 302 deaths, Makkah region, Saudi Arabia**

| Categories    | VACoD | FRCoD | Absolute Difference<br>95%CI |
|---------------|-------|-------|------------------------------|
| Infectious    | 10.2  | 2.0   | -8.2 (-12.0,-4.4)*           |
| Cancer        | 5.2   | 4.4   | -0.8 (-4.2,2.6)              |
| Diabetes      | 14.3  | 15.8  | 1.5 (-4.2,7.2)               |
| Circulatory   | 35.7  | 19.7  | -16.0 (-23.0,-9.0)*          |
| NCD           | 4.5   | 4.9   | 0.4 (-3.0,3.8)               |
| Renal         | 2.8   | 9.2   | 6.4 (2.6,10.2)*              |
| Accidental    | 2.5   | 1.0   | -1.5 (-3.6,0.6)              |
| Indeterminate | 7.7   | 16.8  | 9.1 (3.9,14.3)*              |
| Stroke        | 16.6  | 9.4   | -7.2 (-12.5,-1.9)*           |
| Covid-19      | 0.0   | 13.1  | 13.2 (9.4,17.0)*             |
| Mental        | 0.0   | 3.1   | 3.1 (1.1,5.1)*               |

297 **Abbreviation(s):** FRCoD: Family reported causes of death

298 VACoD: Verbal autopsy causes of death

299 \*Significant Absolute Difference

300

301



302 Based on findings from the CCC, there was an overall agreement between the two approaches  
303 (VACoD and FRCoD) in terms of cause-specific mortality. The Concordance of FRCoD concerning  
304 VACoD and fractions is shown in (Fig 1), with a CCC of 0.60 (95% CI: 0.20-1.00; p=003).

305

306

307

308

309

310

311

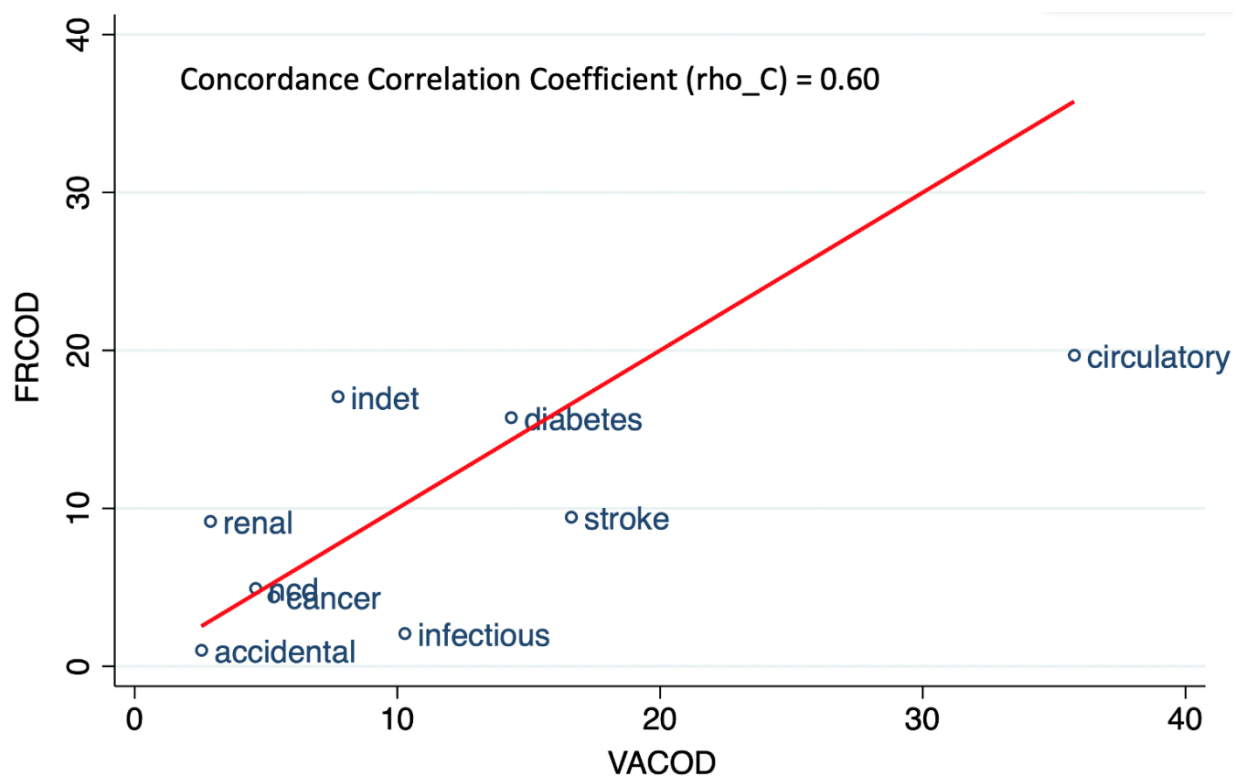

312

313 **Fig 1. Concordance correlation coefficient (log-logscale) between CSMF determined by VA and**  
314 **respondent reports, in relation to the line of equivalence, for 302 deaths in Makkah city,**  
315 **Saudi Arabia.**

316

## 317 Discussion

318 The year 2030 is expected to be an exceptional milestone for Saudi Arabia, with a  
319 comprehensive agenda involving the assessment of essential national and global goals. The 17  
320 Sustainable Development Goals (SDGs) including goal target 3.7 (*ensuring universal access to*  
321 *health-care services including for family planning, information, and education as well as*  
322 *vaccination*), and goal target 3.8 (*achieving Universal Health Coverage*), as well as the Saudi  
323 National 2030 Vision goals will both be assessed and disseminated. Creating partnerships with

324 the private sector, academia, and civil society with an emphasis on strengthening civil  
325 registration and vital statistic systems (CRVS) would be crucial elements for succeeding in these  
326 national and global goals. However, gaps in registering vital data persist (a main task attributed  
327 to the CRVS), and despite increasing calls for employing standardized VA concepts to  
328 strengthen public health applications, including the CRVS, the VA approach is entirely novel in  
329 Saudi Arabia and many other neighboring countries where gaps in causes of death information  
330 exist. Exploring the perception of public health aspects, essentially how causes of death are  
331 perceived within communities in Saudi Arabia is crucial while the country's health system is  
332 now undergoing a significant re-engineering process towards national and global agenda.

333  
334 This study findings show a generally broad spectrum of community perceived mortalities with  
335 some crucial misconception based on the type of death and the background and characteristics  
336 of the deceased. During the data collection period, the world has experienced a devastating  
337 COVID-19 pandemic, which has ultimately re-profiled deaths and influenced the public and  
338 medical opinions of causes of death in Saudi Arabia and elsewhere. While the concept of  
339 community perception assessment is not new, understanding how local communities perceive  
340 cause of deaths, and consequently recognizing their associated risk factors is now timely and  
341 more crucial in view of the health and health system transitions due to COVID-19. Proposing  
342 such a standardized assessment would also be of interest to the Saudi health system to  
343 continuously monitor the health literacy of the people particularly within such dynamic Saudi  
344 communities. Based on published reports, low health literacy – which is how people are able to  
345 access, understand and utilize information and facilities to guide health-related decisions for

346 themselves and other members in their communities – contributes to a wide range of health  
347 problems and is associated with poor health outcomes and ineffective chronic diseases  
348 management and treatments, such as the case of diabetes [16, 42, 43].

349

350 The study utilized VA to explore the community perceptions, which is mostly amenable for  
351 estimating CSMFs at population level and can adequately direct intended funds and  
352 interventional public health programs [44-46]. This study findings showed relatively minimal  
353 community misconception based on the derived CSMFs across diabetes, NCD, and accidental  
354 causes of death categories, implying that communities were more aware of and able to  
355 plausibly recognize these diseases as ultimate causes of death. Diabetes as a chronic illness  
356 demands frequent presentation at the healthcare services for routine follow up and  
357 treatments. High level of exposure to valid health information via professional medical  
358 practitioners can positively contribute to the community health literacy level, which may  
359 explain the higher level of perception for this cause of death category and likely other diseases  
360 from the NCD category. It can be said that communities are influenced by what they remember  
361 of signs and circumstances of death events whereas other factors such as exposure to local  
362 beliefs or to professional health practices can influence the subject's memory [47]. For a  
363 disease such as cancer for instance, mental representations of death can be exceptionally  
364 influential and highlight how communities may perceive some inevitable illnesses [48]. This  
365 study shows trivial CSMF differences due to cancer, where communities are arguably  
366 attributing cancer illness to death in a plausible manner [48, 49]. Features of illness  
367 representations involve views about a disease's etiology, time course, and curability [48].

368 For example, if individuals link cancer with death, they may avoid seeking health care services.

369 In fact, there is considerable evidence that a fatalistic view of cancer hinders adherence to

370 screening guidelines [50] and impeded engagement in cancer protective behaviours such as

371 physical activity, healthy diet and avoid smoking [51, 52]. Hence, addressing fatalistic beliefs

372 through communication about certain diseases like cancer can play an important role in cancer

373 prevention measures. Stroke as a cause of death, was however underestimated by

374 communities, a pattern found to be consistent with previous Saudi and non-Saudi studies [53-

375 55]. Difficulties in recalling or recognizing disease symptoms, rather than a mere lack of

376 knowledge, can possibly explain the observed pattern by communities in relation to stroke, but

377 may also reflect a need for a more effective stroke promotional campaign.

378 Public awareness of diseases that are associated with diabetes mellitus, like renal (kidney) and

379 circulatory diseases are important for public health interventional plans. Our results show that

380 respondents tend to overestimate renal diseases as causes of death, and this pattern is

381 consistent with prior cross-sectional research from Saudi Arabia [56, 57], which revealed a

382 dearth of knowledge about renal diseases among the Saudi population. While the prevalence of

383 renal diseases is relatively high in Saudi Arabia due to climatic, behavioral and genetic factors

384 [58], the Saudi health system has a comprehensive treatment and follow up management, both

385 in terms of dialysis services and kidney transplantation. This interaction between high disease

386 prevalence and adequate healthcare and the fact that most of the study population are

387 presumably diabetic (which is medically associated with renal diseases), seems to influence the

388 community's perception of causes of death related to renal diseases. Saudi communities have

389 underestimated circulatory diseases' cause of death as it was also observed in other published

390 reports revealing low perception of cardiovascular causes of death [59-61]. This  
391 underestimation could be attributed to the disease complexity and general lack of information  
392 and awareness. Although this may seem plausible from a medical point of view, failing to  
393 recognize symptoms of common illnesses can have some public health implications since most  
394 deaths have taken place at hospital settings where relatives or caregivers are presumably  
395 informed about the illness of their deceased. This was also observed in other cross-sectional  
396 studies linking low health literacy skills with unrealistic risk underestimation [62, 63]. Another  
397 plausible explanation is that circulatory diseases are frequently asymptomatic with risk factors  
398 slowly progressing over time leading to delayed recognition and perception. In line with a  
399 previous study [64], which demonstrated a low awareness of major infectious diseases, the  
400 present study revealed a low level of awareness in relation to infectious diseases, which is what  
401 would be expected in such setting due to stigmatization, and discrimination. This pattern  
402 supports the findings of previous studies in Saudi that reported a statistically significant positive  
403 correlation between some infectious diseases and stigma [65-67]. Stigma and discrimination in  
404 communities present a risk when reporting causes of death based on region, sex, and ethnicity,  
405 especially deaths related to stigmatized diseases [68]. As such, stigma can hinder accurate  
406 public awareness of some diseases and act as a barrier to people adopting health-promoting  
407 behaviors, seeking health care, and adhering to treatment.

408 The study findings indicate that community perception tends to be low if the deceased was  
409  $\geq 80$  years compared to 34-59 years. Despite being insignificant, this may be due to older  
410 people being more likely to develop chronic conditions, leading to disease recognition  
411 complexity at this age. Consequently, relatives attribute death to “fate” and perceive it as a

412 natural part of the aging process rather than attributing it to a specific cause. We also found  
413 that community perception improves significantly if the deceased were married compared to  
414 single. Possibly, this is because deceased married individuals have a larger support network,  
415 including their spouse, family, and friends. Despite the ethical implications, symptoms and  
416 medical history of the deceased may have been shared with relatives, enabling a more accurate  
417 determination of the cause of death. Nevertheless, it should be noted that the results may vary  
418 according to the particular population being studied and the research methods used.

419  
420 Although VA is commonly conducted in a registered population (a population being routinely  
421 monitored over time and space such as the concept followed in health socio-demographic and  
422 surveillance system), our study utilized medical records from the Saudi regional diabetes  
423 register as a denominator and later applied the VA process. Thus, the study finding may be  
424 overly pessimistic and have caused overlapping across the death categories. The method's  
425 accuracy of cause of death determination is highly dependent on the type of death, the quality  
426 of the interview, and the procedures used to assign causes of death [26, 69]. A variety of factors  
427 related to the interviewer, the respondent's background, or both can impact the interview  
428 quality and thereafter the VA results. The method has been shown to be reasonably practical  
429 for identifying causes of death in infancy or due to specific conditions such as injuries or  
430 maternal causes. On the other hand, medical causes of adult deaths share symptom complexes,  
431 making it difficult to differentiate between various causes of death from such descriptions  
432 when based solely on symptoms provided by relatives or occasionally by non-relative such as  
433 employers or work colleagues mainly in deaths among expats. Subjects with type 2 diabetes

434 mellitus, for example, have a two- to four-fold increased risk of myocardial infarction and  
435 sudden death compared to individuals without diabetes, whereby roughly half of all diabetes  
436 deaths co-exist with some types of cardiovascular diseases [70]. This demonstrates the  
437 disease's complexities and how the community may fail to recognize the true causes of death  
438 without effective health promotion and educational programs.

439  
440 Despite the use of an internationally recognized standard VA method, interpreting and  
441 generalizing such findings in view of the small sample size can be challenging. The VA telephone  
442 interviews were used instead of the traditional face-to-face method to comply with the  
443 imposed COVID-19 pandemic's physical distancing measures at the time of the data collection.  
444 Nevertheless, numerous studies have found that telephone interviews are as effective as face-  
445 to-face interviews [71, 72]. According to one study, the results of VA interviews via phone calls  
446 were consistent with previous literature, which found that the telephone interview method to  
447 be feasible, accepted by caregivers and healthcare workers, and has a reliable level of data  
448 quality [73]. Given the ethical nature of VA, it can arguably be said that conducting distant VA  
449 interviews on a fairly small sample in an area where VA has never been practiced before can be  
450 viewed as a strength in this study from an ethical perspective, which has the potential of  
451 reducing unwanted emotional or cultural consequences.

## 452 **Conclusion**

453 Diabetes Mellitus is a leading cause of death globally. The Saudi community perception of  
454 causes of death was relatively plausible but varied substantially based on the type of death, sex,



455 age  $\geq 80$  years and other vital events like marital status. Higher or lower community perception  
456 is a proxy of how people may perceive risk factors associated with the causes of death, which  
457 can guide public health interventional programs. Unlike other inconsistent cross-sectional  
458 studies, this study proposed a standardized and sustainable method for monitoring people's  
459 health literacy and allows harmonized comparison over time and space in otherwise  
460 unexplored population. While this study into VA respondents' perceptions of causes of death is  
461 interesting for diabetes-related deaths, communities generated a considerably less complete  
462 and consistent picture of other cause-specific mortality. This highlights the importance of  
463 integrating rigorous and consistent VA methods within the routine medical services rather than  
464 relying on individual opinions mainly for complex causes of death outcomes. Nevertheless,  
465 translating cause-specific mortality data into effective policymaking remains challenging  
466 without standardized assessment of non-medical causes such as social and health system  
467 aspects contributing to death.

## 468 **Acknowledgments**

469 The authors gratefully acknowledge all the deceased's relatives who consented to involvement  
470 in this study. We also appreciate the Saudi Ministry of Health, Makkah Health Affairs, for  
471 approving this study.

472

473

474

475

476

## References

- 477 1. Lin X, Xu Y, Pan X, Xu J, Ding Y, Sun X, et al. Global, regional, and national burden and  
478 trend of diabetes in 195 countries and territories: an analysis from 1990 to 2025. *Scientific*  
479 *reports*. 2020;10(1):1-11.
- 480 2. Sun H, Saeedi P, Karuranga S, Pinkepank M, Ogurtsova K, Duncan BB, et al. IDF Diabetes  
481 Atlas: Global, regional and country-level diabetes prevalence estimates for 2021 and  
482 projections for 2045. *Diabetes research and clinical practice*. 2022;183:109119.
- 483 3. Ogurtsova K, Guariguata L, Barengo NC, Ruiz PL-D, Sacre JW, Karuranga S, et al. IDF  
484 diabetes Atlas: Global estimates of undiagnosed diabetes in adults for 2021. *Diabetes Research*  
485 *and Clinical Practice*. 2022;183:109118.
- 486 4. Fish W. *Philosophy of perception: A contemporary introduction*: Routledge; 2010.
- 487 5. Fottrell E, Tollman S, Byass P, Golooba-Mutebi F, Kahn K. The epidemiology of  
488 'bewitchment' as a lay-reported cause of death in rural South Africa. *J Epidemiol Community*  
489 *Health*. 2012;66(8):704-9.
- 490 6. Hussain-Alkhateeb L, Fottrell E, Petzold M, Kahn K, Byass P. Local perceptions of causes  
491 of death in rural South Africa: a comparison of perceived and verbal autopsy causes of death.  
492 *Glob Health Action*. 2015;8:28302. Epub 2015/07/22. doi: 10.3402/gha.v8.28302. PubMed  
493 PMID: 26193897; PubMed Central PMCID: PMC4507750.
- 494 7. Keikelame MJ, Swartz L. Lost opportunities to improve health literacy: observations in a  
495 chronic illness clinic providing care for patients with epilepsy in Cape Town South Africa.  
496 *Epilepsy & Behavior*. 2013;26(1):36-41.
- 497 8. Pujilestari CU, Ng N, Hakimi M, Eriksson M. "It is not possible for me to have diabetes"—  
498 community perceptions on diabetes and Its risk Factors in Rural Purworejo District, Central  
499 Java, Indonesia. *Global Journal of Health Science*. 2014;6(5):204.
- 500 9. Julia L. Lay experiences of health and illness: past research and future agendas.  
501 *Sociology of health & illness*. 2003;25(3):23-40.
- 502 10. Piko BF, Bak J. Children's perceptions of health and illness: images and lay concepts in  
503 preadolescence. *Health education research*. 2006;21(5):643-53.
- 504 11. Alhawaish AK. Economic costs of diabetes in Saudi Arabia. *Journal of family &*  
505 *community medicine*. 2013;20(1):1.
- 506 12. Alotaibi A, Perry L, Gholizadeh L, Al-Ganmi A. Incidence and prevalence rates of diabetes  
507 mellitus in Saudi Arabia: An overview. *Journal of epidemiology and global health*.  
508 2017;7(4):211-8.
- 509 13. Alwin Robert A, Abdulaziz Al Dawish M, Braham R, Ali Musallam M, Abdullah Al Hayek A,  
510 Hazza Al Kahtany N. Type 2 diabetes mellitus in Saudi Arabia: major challenges and possible  
511 solutions. *Current diabetes reviews*. 2017;13(1):59-64.
- 512 14. Al-Hanawi MK, Angawi K, Alshareef N, Qattan AM, Helmy HZ, Abudawood Y, et al.  
513 Knowledge, attitude and practice toward COVID-19 among the public in the Kingdom of Saudi  
514 Arabia: a cross-sectional study. *Frontiers in public health*. 2020;8:217.
- 515 15. Alasiri AA, Mohammed V. Healthcare Transformation in Saudi Arabia: An Overview Since  
516 the Launch of Vision 2030. *Health Serv Insights*. 2022;15:11786329221121214. Epub

- 517 2022/09/10. doi: 10.1177/11786329221121214. PubMed PMID: 36081830; PubMed Central  
518 PMCID: PMCPMC9445529.
- 519 16. Abdel-Latif MM, Saad SY. Health literacy among Saudi population: a cross-sectional  
520 study. *Health promotion international*. 2019;34(1):60-70.
- 521 17. Almubark R, Basyouni M, Alghanem A, Althumairi N, Alkhamis D, Alharbi LS, et al. Health  
522 literacy in Saudi Arabia: Implications for public health and healthcare access. *Pharmacology  
523 Research & Perspectives*. 2019;7(4):e00514.
- 524 18. AbuAlreesh A, Alburikan KA. Health literacy among patients with poor understanding of  
525 prescription drug label instructions in Saudi Arabia. *Saudi Pharmaceutical Journal*.  
526 2019;27(6):900-5.
- 527 19. Byass P, Hussain-Alkhateeb L, D'Ambruoso L, Clark S, Davies J, Fottrell E, et al. An  
528 integrated approach to processing WHO-2016 verbal autopsy data: the InterVA-5 model. *BMC  
529 Med*. 2019;17(1):102. Epub 2019/05/31. doi: 10.1186/s12916-019-1333-6. PubMed PMID:  
530 31146736; PubMed Central PMCID: PMCPMC6543589.
- 531 20. D'Ambruoso L, Kahn K, Wagner RG, Twine R, Spies B, Van Der Merwe M, et al. Moving  
532 from medical to health systems classifications of deaths: extending verbal autopsy to collect  
533 information on the circumstances of mortality. *Global health research and policy*. 2016;1(1):1-  
534 15.
- 535 21. D'Ambruoso L, Price J, Cowan E, Goosen G, Fottrell E, Herbst K, et al. Refining  
536 circumstances of mortality categories (COMCAT): a verbal autopsy model connecting  
537 circumstances of deaths with outcomes for public health decision-making. *Global health action*.  
538 2021;14(sup1):2000091.
- 539 22. Hussain-Alkhateeb L, D'Ambruoso L, Tollman S, Kahn K, Van Der Merwe M, Twine R, et  
540 al. Enhancing the value of mortality data for health systems: adding Circumstances Of Mortality  
541 CATegories (COMCATs) to deaths investigated by verbal autopsy. *Glob Health Action*.  
542 2019;12(1):1680068. Epub 2019/10/28. doi: 10.1080/16549716.2019.1680068. PubMed PMID:  
543 31648624; PubMed Central PMCID: PMCPMC6818104.
- 544 23. Thomas L-M, D'Ambruoso L, Balabanova D. Verbal autopsy in health policy and systems:  
545 a literature review. *BMJ global health*. 2018;3(2):e000639.
- 546 24. Elebro K, Röst M, Moussa K, Johnsdotter S, Essén B. Misclassified maternal deaths  
547 among East African immigrants in Sweden. *Reproductive health matters*. 2007;15(30):153-62.
- 548 25. Baiden F, Bawah A, Biai S, Binka F, Boerma T, Byass P, et al. Setting international  
549 standards for verbal autopsy. *SciELO Public Health*; 2007. p. 570-1.
- 550 26. Fottrell E, Byass P. Verbal autopsy: methods in transition. *Epidemiologic reviews*.  
551 2010;32(1):38-55.
- 552 27. Bauni E, Ndila C, Mochamah G, Nyutu G, Matata L, Ondieki C, et al. Validating physician-  
553 certified verbal autopsy and probabilistic modeling (InterVA) approaches to verbal autopsy  
554 interpretation using hospital causes of adult deaths. *Population health metrics*. 2011;9(1):1-12.
- 555 28. Leitao J, Desai N, Aleksandrowicz L, Byass P, Miasnikof P, Tollman S, et al. Comparison of  
556 physician-certified verbal autopsy with computer-coded verbal autopsy for cause of death  
557 assignment in hospitalized patients in low-and middle-income countries: systematic review.  
558 *BMC medicine*. 2014;12(1):1-9.

- 559 29. Kalter HD, Salgado R, Babilie M, Koffi AK, Black RE. Social autopsy for maternal and child  
560 deaths: a comprehensive literature review to examine the concept and the development of the  
561 method. *Population health metrics*. 2011;9(1):1-13.
- 562 30. Källander K, Kadobera D, Williams TN, Nielsen RT, Yevo L, Mutebi A, et al. Social  
563 autopsy: INDEPTH Network experiences of utility, process, practices, and challenges in  
564 investigating causes and contributors to mortality. *Population health metrics*. 2011;9(1):1-12.
- 565 31. McCormick TH, Li ZR, Calvert C, Crampin AC, Kahn K, Clark SJ. Probabilistic cause-of-  
566 death assignment using verbal autopsies. *Journal of the American Statistical Association*.  
567 2016;111(515):1036-49.
- 568 32. Hart JD, de André PA, de André CDS, Adair T, Barroso LP, Valongueiro S, et al. Validation  
569 of SmartVA using conventional autopsy: a study of adult deaths in Brazil. *The Lancet Regional  
570 Health-Americas*. 2022;5:100081.
- 571 33. Chandramohan D, Fottrell E, Leitao J, Nichols E, Clark SJ, Alsokhn C, et al. Estimating  
572 causes of death where there is no medical certification: evolution and state of the art of verbal  
573 autopsy. *Global Health Action*. 2021;14(sup1):1982486.
- 574 34. Aukes AM, Arion K, Bone JN, Li J, Vidler M, Bellad MB, et al. Causes and circumstances of  
575 maternal death: a secondary analysis of the Community-Level Interventions for Pre-eclampsia  
576 (CLIP) trials cohort. *Lancet Glob Health*. 2021;9(9):e1242-e51. Epub 2021/08/02. doi:  
577 10.1016/s2214-109x(21)00263-1. PubMed PMID: 34332699; PubMed Central PMCID:  
578 PMCPMC8370879.
- 579 35. Thomas LM, D'Ambruoso L, Balabanova D. Verbal autopsy in health policy and systems:  
580 a literature review. *BMJ Glob Health*. 2018;3(2):e000639. Epub 2018/05/08. doi:  
581 10.1136/bmjgh-2017-000639. PubMed PMID: 29736271; PubMed Central PMCID:  
582 PMCPMC5935163.
- 583 36. Byass P, Chandramohan D, Clark SJ, D'ambruoso L, Fottrell E, Graham WJ, et al.  
584 Strengthening standardised interpretation of verbal autopsy data: the new InterVA-4 tool.  
585 *Global health action*. 2012;5(1):19281.
- 586 37. Fantahun M, Fottrell E, Berhane Y, Wall S, Högberg U, Byass P. Assessing a new  
587 approach to verbal autopsy interpretation in a rural Ethiopian community: the InterVA model.  
588 *Bulletin of the World Health Organization*. 2006;84(3):204-10.
- 589 38. Streatfield PK, Khan WA, Bhuiya A, Alam N, Sié A, Soura AB, et al. Cause-specific  
590 mortality in Africa and Asia: evidence from INDEPTH health and demographic surveillance  
591 system sites. *Global health action*. 2014;7(1):25362.
- 592 39. Leitao J, Chandramohan D, Byass P, Jakob R, Bundhamcharoen K, Choprapawon C, et al.  
593 Revising the WHO verbal autopsy instrument to facilitate routine cause-of-death monitoring.  
594 *Global health action*. 2013;6(1):21518.
- 595 40. Lawrence I, Lin K. A concordance correlation coefficient to evaluate reproducibility.  
596 *Biometrics*. 1989:255-68.
- 597 41. Byass P, Herbst K, Fottrell E, Ali MM, Odhiambo F, Amek N, et al. Comparing verbal  
598 autopsy cause of death findings as determined by physician coding and probabilistic modelling:  
599 a public health analysis of 54 000 deaths in Africa and Asia. *Journal of global health*. 2015;5(1).
- 600 42. Berkman ND, Sheridan SL, Donahue KE, Halpern DJ, Crotty K. Low health literacy and  
601 health outcomes: an updated systematic review. *Annals of internal medicine*. 2011;155(2):97-  
602 107.

- 603 43. Kindig DA, Panzer AM, Nielsen-Bohlman L. Health literacy: a prescription to end  
604 confusion. 2004.
- 605 44. Chandramohan D, Maude GH, Rodrigues LC, Hayes RJ. Verbal autopsies for adult deaths:  
606 their development and validation in a multicentre study. *Tropical Medicine & International*  
607 *Health*. 1998;3(6):436-46.
- 608 45. Quigley M, Schellenberg JA, Snow RW. Algorithms for verbal autopsies: a validation  
609 study in Kenyan children. *Bulletin of the World Health Organization*. 1996;74(2):147.
- 610 46. Quigley MA, Chandramohan D, Rodrigues LC. Diagnostic accuracy of physician review,  
611 expert algorithms and data-derived algorithms in adult verbal autopsies. *International journal*  
612 *of epidemiology*. 1999;28(6):1081-7.
- 613 47. Kessels RP. Patients' memory for medical information. *Journal of the Royal Society of*  
614 *Medicine*. 2003;96(5):219-22.
- 615 48. Moser RP, Arndt J, Han PK, Waters EA, Amsellem M, Hesse BW. Perceptions of cancer as  
616 a death sentence: prevalence and consequences. *Journal of health psychology*.  
617 2014;19(12):1518-24.
- 618 49. Robb KA, Simon AE, Miles A, Wardle J. Public perceptions of cancer: a qualitative study  
619 of the balance of positive and negative beliefs. *BMJ open*. 2014;4(7):e005434.
- 620 50. Niederdeppe J, Levy AG. Fatalistic beliefs about cancer prevention and three prevention  
621 behaviors. *Cancer Epidemiology Biomarkers & Prevention*. 2007;16(5):998-1003.
- 622 51. Clarke JN, Everest MM. Cancer in the mass print media: Fear, uncertainty and the  
623 medical model. *Social science & medicine*. 2006;62(10):2591-600.
- 624 52. Miles A, Rainbow S, von Wagner C. Cancer Fatalism and Poor Self-Rated Health Mediate  
625 the Association between Socioeconomic Status and Uptake of Colorectal Cancer Screening in  
626 England Socioeconomic Status, Fatalism, Health, and CRC Screening. *Cancer epidemiology,*  
627 *biomarkers & prevention*. 2011;20(10):2132-40.
- 628 53. Alaqeel A, AlAmmari A, AlSyefi N, Al-Hussain F, Mohammad Y. Stroke awareness in the  
629 Saudi community living in Riyadh: prompt public health measures must be implemented.  
630 *Journal of Stroke and Cerebrovascular Diseases*. 2014;23(3):500-4.
- 631 54. Basfar WM, Al-Sebyani AE, Aljawi GA, Milyani HA, Jan MM. Public knowledge of stroke  
632 amongst a saudi population. *World Journal of Research and Review*. 2016;3(2):262912.
- 633 55. Krishnamurthi RV, Barker-Collo S, Barber PA, Tippet LJ, Dalrymple-Alford JC, Tunnage B,  
634 et al. Community knowledge and awareness of stroke in New Zealand. *Journal of Stroke and*  
635 *Cerebrovascular Diseases*. 2020;29(3):104589.
- 636 56. Al-Husayni F, Al-Zahrani A, Zwawy M, Alamri S, Aljedaani R, Almalki A. The awareness  
637 and perception of chronic kidney disease in Jeddah, Saudi Arabia. *Saudi Journal of Kidney*  
638 *Diseases and Transplantation*. 2021;32(2):488.
- 639 57. Alobaidi S. Knowledge of chronic kidney disease among the population of Saudi Arabia  
640 evaluated using a validated questionnaire: a cross-sectional study. *Patient preference and*  
641 *adherence*. 2021;15:1281.
- 642 58. Mousa D, Alharbi A, Helal I, Al-Homrany M, Alhujaili F, Alhweish A, et al. Prevalence and  
643 Associated Factors of Chronic Kidney Disease among Relatives of Hemodialysis Patients in Saudi  
644 Arabia. *Kidney international reports*. 2021;6(3):817.

- 645 59. Al-Baghli NA, Al-Ghamdi AJ, Al-Turki KA, El-Zubaier AG, Al-Mostafa BA, Al-Baghli FA, et  
646 al. Awareness of cardiovascular disease in eastern Saudi Arabia. *Journal of Family and*  
647 *Community Medicine*. 2010;17(1):15.
- 648 60. AL-Tamimi I, Bawazir A. Knowledge and Perceived Susceptibility of Cardiovascular  
649 Diseases (CVDs) among Saudi Female Teachers. *Into Arch Public Health Community Med*.  
650 2020;4(45):1-10.
- 651 61. Homko CJ, Santamore WP, Zamora L, Shirk G, Gaughan J, Cross R, et al. Cardiovascular  
652 disease knowledge and risk perception among underserved individuals at increased risk of  
653 cardiovascular disease. *Journal of Cardiovascular Nursing*. 2008;23(4):332-7.
- 654 62. Bekele DM, Goshu DY, Yalew AW, Higgins MK, Gary RA. Low Subjective Cardiovascular  
655 Disease Risk Perceptions among Hypertensive Patients in Addis Ababa, Ethiopia. *Integrated*  
656 *Blood Pressure Control*. 2022;15:81.
- 657 63. Webster R, Heeley E. Perceptions of risk: understanding cardiovascular disease. *Risk*  
658 *Management and Healthcare Policy*. 2010;3:49.
- 659 64. Liu H, Li M, Jin M, Jing F, Wang H, Chen K. Public awareness of three major infectious  
660 diseases in rural Zhejiang province, China: a cross-sectional study. *BMC infectious diseases*.  
661 2013;13(1):1-9.
- 662 65. Alhazzani AA, Alqahtani AM, Abouelyazid A, Alqahtani AM, Alqahtani NA, Asiri KM, et al.  
663 Public awareness, knowledge, and attitudes toward epilepsy in the Aseer region, Saudi Arabia—  
664 a community-based cross-sectional study. *Epilepsy & Behavior*. 2016;63:63-6.
- 665 66. Almoayad F, Mahboub S, Amer LB, Alrabiah A, Alhashem A. Stigmatisation of COVID-19  
666 in Riyadh, Saudi Arabia: a cross-sectional study. *Sultan Qaboos University Medical Journal*.  
667 2021;21(4):525.
- 668 67. Raheel H. Stigma towards people living with HIV/AIDS (PLWAs) among adolescents of  
669 Riyadh, Kingdom of Saudi Arabia. *J AIDS Clin Res*. 2016;7(612):2.
- 670 68. Hinga A, Marsh V, Nyaguara A, Wamukoya M, Molyneux S. The ethical implications of  
671 verbal autopsy: responding to emotional and moral distress. *BMC medical ethics*. 2021;22(1):1-  
672 16.
- 673 69. Yang G, Rao C, Ma J, Wang L, Wan X, Dubrovsky G, et al. Validation of verbal autopsy  
674 procedures for adult deaths in China. *International journal of epidemiology*. 2006;35(3):741-8.
- 675 70. Vargas RB, Mangione CM, Asch S, Keesey J, Rosen M, Schonlau M, et al. Can a chronic  
676 care model collaborative reduce heart disease risk in patients with diabetes? *Journal of general*  
677 *internal medicine*. 2007;22(2):215-22.
- 678 71. Block ES, Erskine L. Interviewing by telephone: Specific considerations, opportunities,  
679 and challenges. *International journal of qualitative methods*. 2012;11(4):428-45.
- 680 72. Holt A. Using the telephone for narrative interviewing: a research note. *Qualitative*  
681 *research*. 2010;10(1):113-21.
- 682 73. binti Nasaruddin NH, Ganapathy SS, Awaluddin SM, Anuar MFM, binti Alias N, Mang CY,  
683 et al. Conducting verbal autopsy by telephone interview during the pandemic to support  
684 mortality surveillance: a feasibility study in Malaysia: Verbal autopsy telephone interview.  
685 *Western Pacific Surveillance and Response*. 2022;13(2).
- 686

687

688 **Supporting information**

689 **S1 Table. Categorizing of causes of death reported by VA and families**

| Category            | Cause of death                                                                                                                                                                                                     |
|---------------------|--------------------------------------------------------------------------------------------------------------------------------------------------------------------------------------------------------------------|
| Infectious diseases | Sepsis (non-obstetric)<br>Acute resp infect incl pneumonia<br>HIV/AIDS related death<br>Pulmonary tuberculosis<br>Other and unspecified infect diseases                                                            |
| Cancer              | Digestive neoplasms<br>Respiratory neoplasms<br>Breast neoplasms<br>Other and unspecified neoplasms<br>Pancreatic cancer, Lung cancer<br>Tumors, Head cancer                                                       |
| Diabetes mellitus   | Diabetes mellitus<br>Gangrene, Diabetic foot amputation, foot ulcer                                                                                                                                                |
| Circulatory         | Acute cardiac disease<br>Other and unspecified cardiac disease<br>Heart failure, heart attack cardiomyopathy or myocardial insufficiency<br>Cardiac arrest, Heart attack, Hypertension, Hypotension, Heart disease |
| NCD                 | Chronic obstructive pulmonary disease<br>Abdominal related<br>Acute abdomen<br>Other and unspecified NCD                                                                                                           |
| Renal               | Kidney disease, kidney failure, dialysis<br>Renal failure                                                                                                                                                          |
| Accidental          | Accidental fall<br>Road traffic accident<br>Accidental injuries<br>Accidental expos to smoke fire & flame                                                                                                          |
| Indeterminate       | Any cause of death that has no ICD code                                                                                                                                                                            |
| Stroke              | Stroke                                                                                                                                                                                                             |
| Covid-19            | Covid-19                                                                                                                                                                                                           |
| Mental illness      | Dementia, Alzheimer                                                                                                                                                                                                |

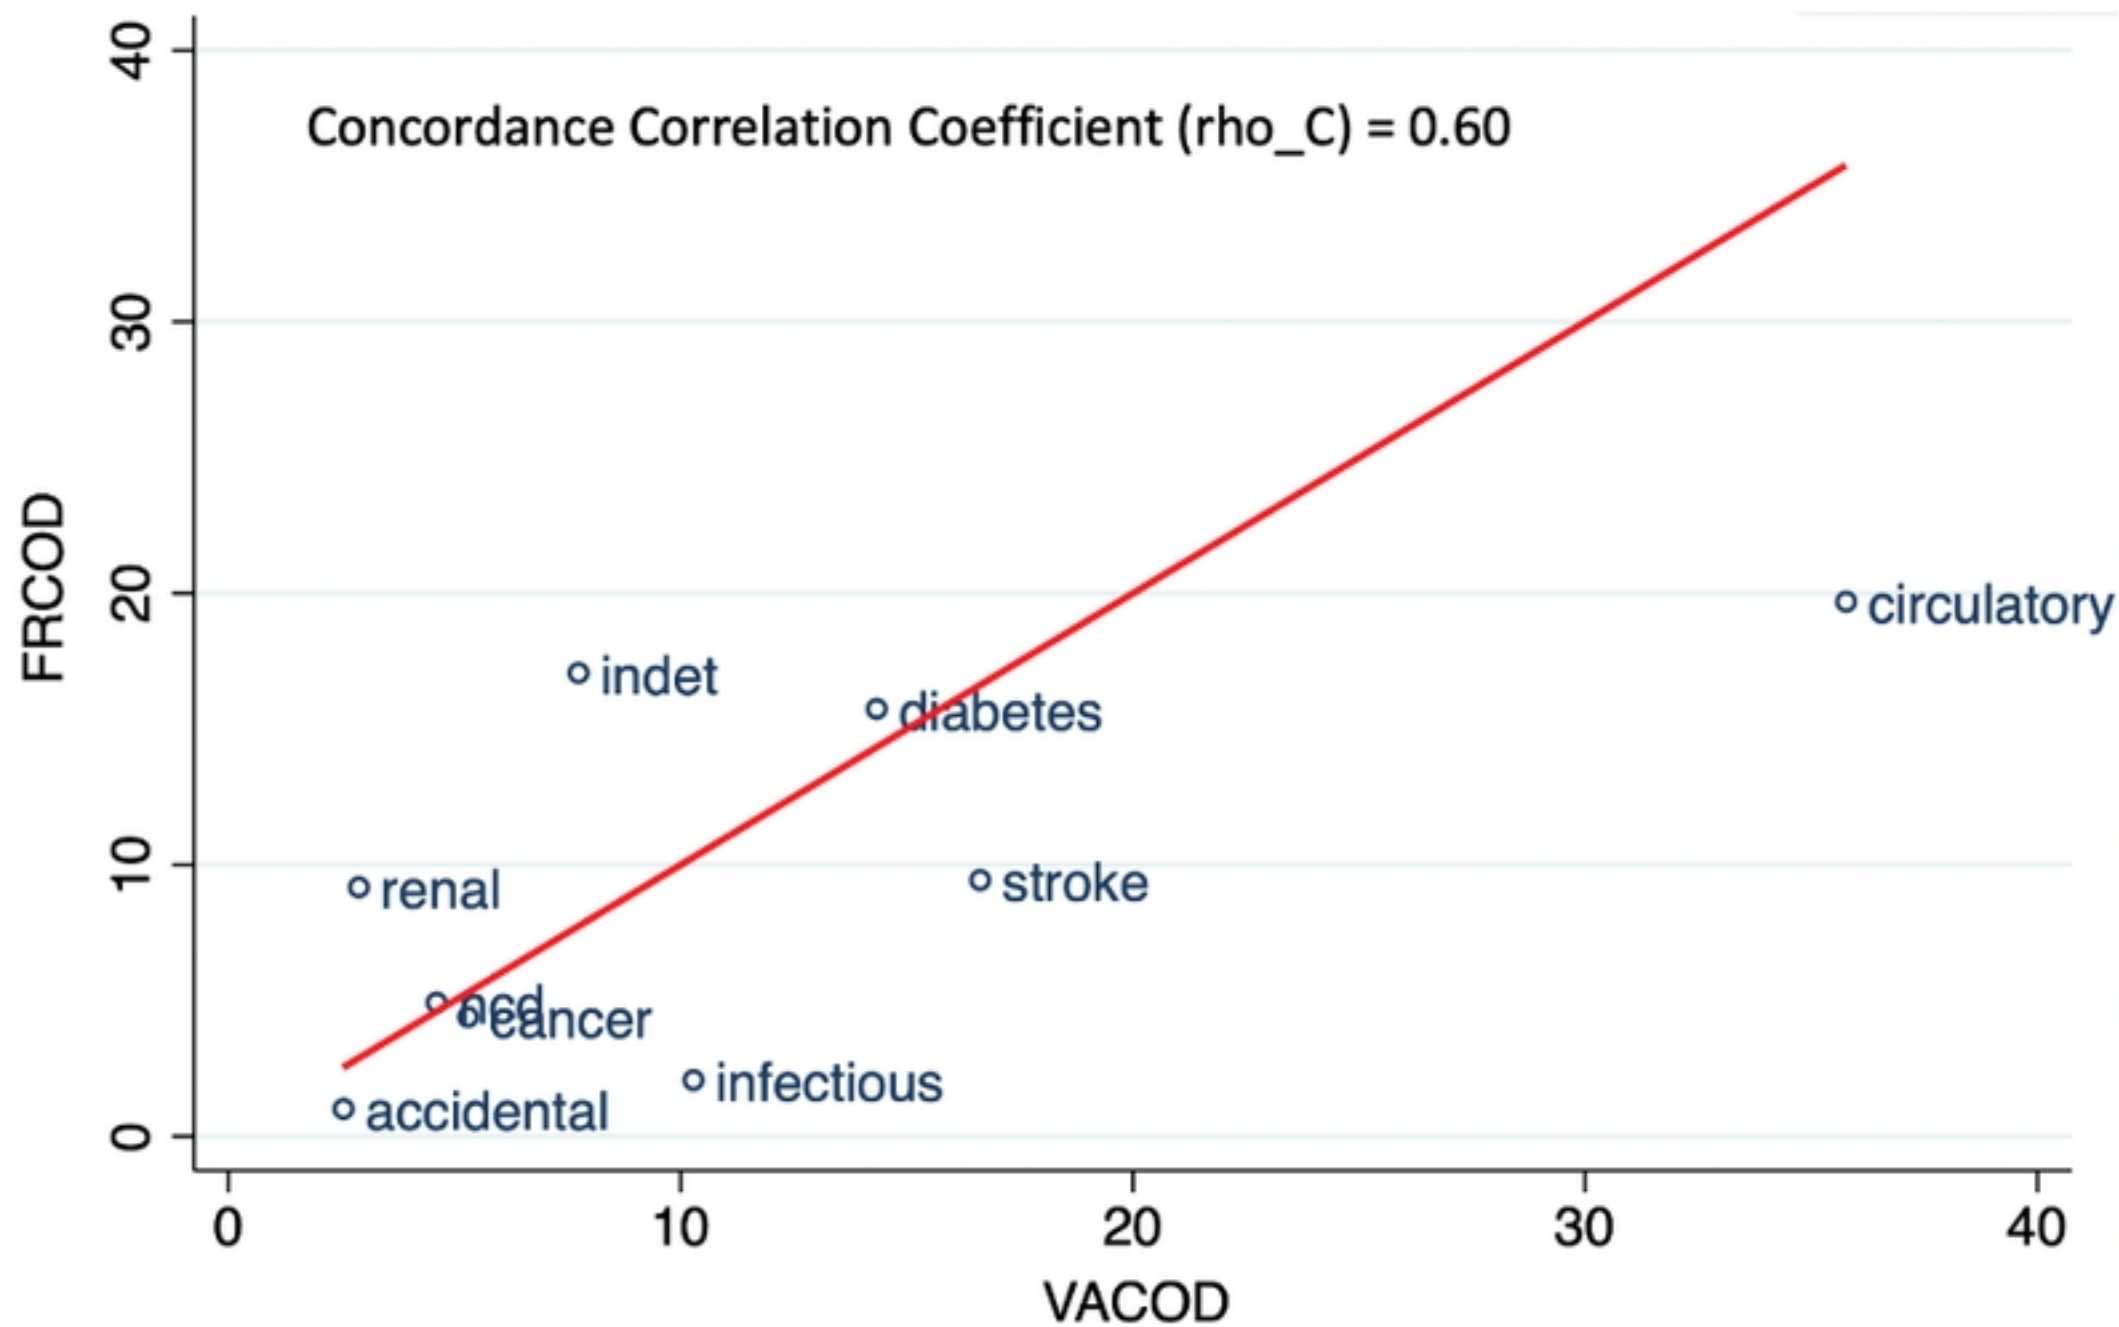

**Fig 1. Concordance correlation coefficient (log-logscale) between CSMF determined by VA and respondent reports, in relation to the line of equivalence, for 302 deaths in Makkah city, Saudi Arabia.**

Figure
